# Supplementary material for: Could Physical Fitness Be Considered as a Protective Social Factor Associated with Bridging the Cognitive Gap Related to School Vulnerability in Adolescents? The Cogni-Action Project
Source: MDPI journal article supplement (doi:10.3390/ijerph181910073), 2021-09-25
Supplement: s1 [file s1]

## Supplementary Material

**Table S1.** Fitness mediation analyses on adolescents' cognitive performance by SVI levels according the two models.

| Global Fitness Score |         | Total effect (c)      | Direct effect (c')    | Indirect effect (a*b) | Mediation % | Mediation Type |
|----------------------|---------|-----------------------|-----------------------|-----------------------|-------------|----------------|
| <b>SVI-GFS-COG</b>   | Model 1 | -3.12* (-3.79, -2.44) | -2.84* (-3.52, -2.16) | -0.27* (-0.44, -0.13) | 9.0         | Partial        |
| Low/Mid-SVI          | Model 1 | -1.60 (-3.12, -0.08)  | -0.86 (-2.39, 0.67)   | -0.74* (-1.18, -0.38) | 46.3        | Full           |
| Low/High-SVI         | Model 1 | -5.99* (-7.36, -4.61) | -5.32* (-6.70, -3.94) | -0.66* (-1.06, -0.34) | 11.2        | Partial        |
| Mid/High-SVI         | Model 1 | -4.38* (-5.71, -3.05) | -4.46* (-5.77, -3.15) | 0.07 (-0.12, 0.31)    | -1.8        | No mediation   |
| <b>CRF</b>           |         |                       |                       |                       |             |                |
| <b>SVI-CRF-COG</b>   | Model 1 | -3.23* (-3.89, -2.57) | -3.05* (-3.71, -2.38) | -0.18* (-0.32, -0.06) | 5.6         | Partial        |
|                      | Model 2 | -2.90* (-3.60, -2.23) | -2.85* (-3.54, -2.17) | -0.06 (-0.16, 0.00)   | 1.7         | No mediation   |
| Low/Mid-SVI          | Model 1 | -1.63* (-3.13, -0.13) | -1.38 (-2.87, 0.11)   | -0.25* (-0.51, -0.06) | 15.3        | Full           |
|                      | Model 2 | -0.74 (-2.29, 0.81)   | -0.78 (-2.33, 0.76)   | 0.04 (-0.05, 0.19)    | -5.4        | No mediation   |
| Low/High-SVI         | Model 1 | -6.17* (-7.51, -4.83) | -5.79* (-7.14, -4.44) | -0.38* (-0.67, -0.14) | 6.2         | Partial        |
|                      | Model 2 | -5.47* (-6.85, -4.08) | -5.37* (-6.76, -3.99) | -0.09 (-0.27, 0.02)   | 1.8         | No mediation   |
| Mid/High-SVI         | Model 1 | -4.53* (-5.82, -3.25) | -4.41* (-5.68, -3.13) | -0.12 (-0.32, 0.02)   | 2.6         | No mediation   |
|                      | Model 2 | -4.72* (-6.07, -3.38) | -4.59* (-5.94, -3.24) | -0.13 (-0.36, 0.02)   | 2.8         | No mediation   |
| <b>MF</b>            |         |                       |                       |                       |             |                |
| <b>SVI-MF-COG</b>    | Model 1 | -3.25* (-3.91, -2.59) | -3.02* (-3.68, -2.35) | -0.23* (-0.40, -0.09) | 7.1         | Partial        |

|                    |         |                       |                       |                       |      |              |
|--------------------|---------|-----------------------|-----------------------|-----------------------|------|--------------|
|                    | Model 2 | -2.91* (-3.59, -2.23) | -2.85* (-3.54, -2.17) | -0.05 (-0.17, 0.03)   | 2.1  | No mediation |
| Low/Mid-SVI        | Model 1 | -1.51* (-3.00, -0.02) | -1.11 (-2.60, 0.37)   | -0.39* (-0.71, -0.14) | 26.5 | Full         |
|                    | Model 2 | -0.81 (-2.36, 0.74)   | -0.78 (-2.33, 0.76)   | -0.02 (-0.14, 0.04)   | 3.7  | No mediation |
| Low/High-SVI       | Model 1 | -6.19* (-7.52, -4.86) | -5.67* (-7.03, -4.32) | -0.51* (-0.87, -0.22) | 8.4  | Partial      |
|                    | Model 2 | -5.47* (-6.85, -4.10) | -5.37* (-6.76, -3.99) | -0.10 (-0.31, 0.07)   | 1.8  | No mediation |
| Mid/High-SVI       | Model 1 | -4.67* (-5.95, -3.40) | -4.56* (-5.83, -3.29) | -0.11 (-0.30, 0.03)   | 2.4  | No mediation |
|                    | Model 2 | -4.66* (-6.01, -3.32) | -4.59* (-5.94, -3.24) | -0.07 (-0.25, 0.05)   | 1.5  | No mediation |
| <b>SAF</b>         |         |                       |                       |                       |      |              |
| <b>SVI-SAF-COG</b> | Model 1 | -3.27* (-3.92, -2.61) | -3.18* (-3.84, -2.53) | -0.08* (-0.17, -0.00) | 2.8  | Partial      |
|                    | Model 2 | -2.82* (-3.50, -2.13) | -2.85* (-3.54, -2.17) | 0.03 (-0.00, 0.10)    | -1.1 | No mediation |
| Low/Mid-SVI        | Model 1 | -1.41 (-2.89, 0.06)   | -0.66 (-2.16, 0.84)   | -0.75* (-1.17, -0.38) | 53.2 | Full         |
|                    | Model 2 | -1.12 (-2.64, 0.40)   | -0.78 (-2.33, 0.76)   | -0.33* (-0.66, -0.05) | 30.4 | Full         |
| Low/High-SVI       | Model 1 | -6.20* (-7.53, -4.86) | -5.88* (-7.20, -4.55) | -0.31* (-0.54, -0.13) | 5.2  | Partial      |
|                    | Model 2 | -5.34* (-6.73, -3.95) | -5.37* (-6.76, -3.99) | 0.03 (-0.05, 0.15)    | -0.6 | Partial      |
| Mid/High-SVI       | Model 1 | -4.78* (-6.05, -3.52) | -5.21* (-6.48, -3.95) | 0.43* (0.18, 0.75)    | -9.0 | Partial      |
|                    | Model 2 | -4.22* (-5.53, -2.90) | -4.59* (-5.94, -3.24) | 0.37* (0.07, 0.75)    | -8.8 | Partial      |

SVI: School Vulnerability Index, GFS: Global Fitness Score, COG: Cognitive performance, CRF: Cardiorespiratory fitness, MF: Muscular fitness, SAF: Speed/agility

fitness. \* indicates significant statistically. Model 1: adjusted for sex, PHV, BMIz, and schools. Model 2: Model 1 plus (other two fitness components).
